# Supplementary material for: Microbial Associations With Microscopic Colitis
Source: PubMed Central journal article supplement — Clin Transl Gastroenterol. 2022 Aug 27;13(10):e00528. doi: 10.14309/ctg.0000000000000528 (PMC9624492; doi:10.14309/ctg.0000000000000528), 2022-08-27
Supplement: ct9-13-e00528-s001.pdf [file ct9-13-e00528-s001.pdf]

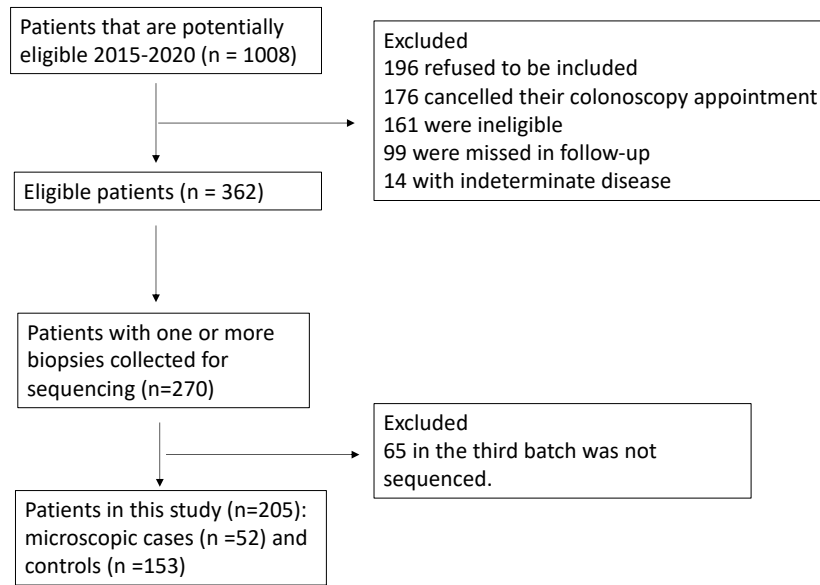

Fig. S1. Selection criteria for the current analysis.

## ASC

Case\_Ctrl R2 = 0.01159 P= 0.09

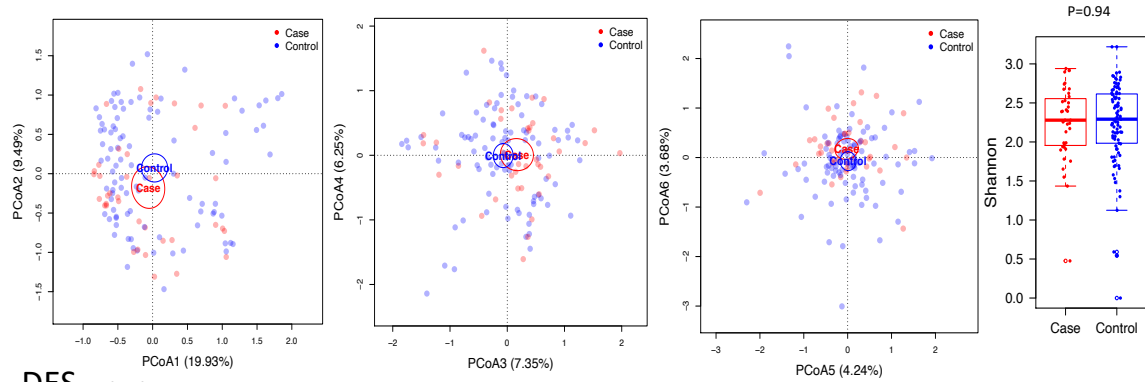

## DES

Case\_Ctrl R2 = 0.0147 P= 0.031

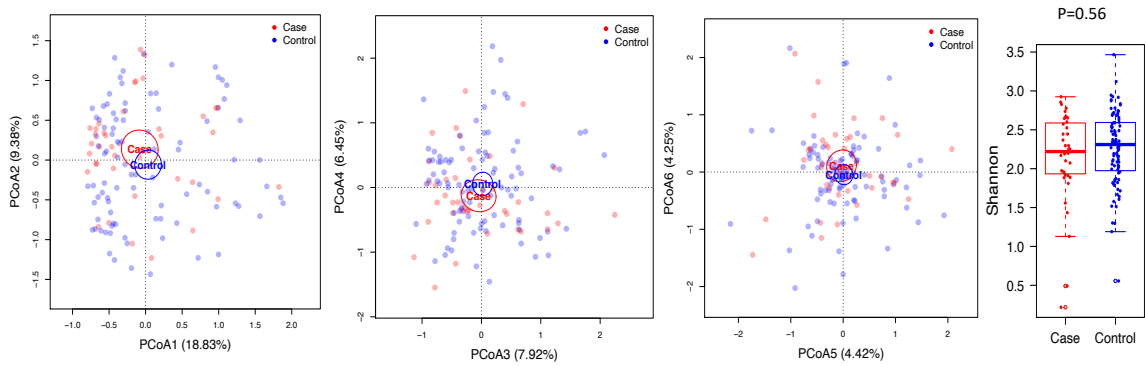

Fig. S2. PCoA plots and alpha-diversity of the ascending (ASC) and descending (DES) colon microbiomes of study participants without antibiotics intake (n=132: 39 cases and 93 controls). The ellipses in PCoA plots indicate 95% confidence limits. The boxplots showed the median, 25th and 75th percentile.

group

- Case
- Control

abundance

- <0.01%
- 0.01–0.05%
- 0.05–0.5%
- 0.5–5%
- >5%

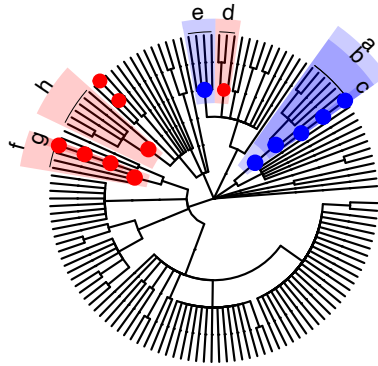

Model1

- a Coriobacteria
- b Coriobacteriales
- c Coriobacteriaceae
- d Marinifilaceae
- e Prevotellaceae
- f Lactobacillales
- g Streptococcaceae
- h Betaproteobacteriales

group

- Case
- Control

abundance

- <0.01%
- 0.01–0.05%
- 0.05–0.5%
- 0.5–5%
- >5%

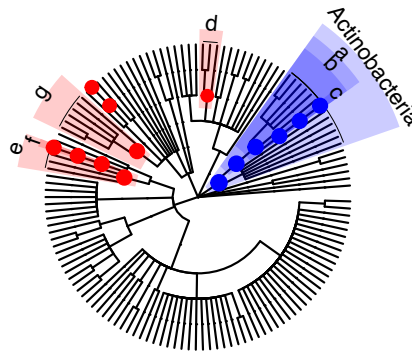

Model2

- a Coriobacteria
- b Coriobacteriales
- c Coriobacteriaceae
- d Marinifilaceae
- e Lactobacillales
- f Streptococcaceae
- g Betaproteobacteriales

group

- Case

abundance

- <0.01%
- 0.01–0.05%
- 0.05–0.5%
- 0.5–5%
- >5%

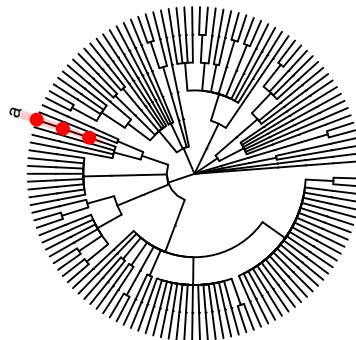

Model3

- a Streptococcaceae

group

- Case

abundance

- <0.01%
- 0.01–0.05%
- 0.05–0.5%
- 0.5–5%
- >5%

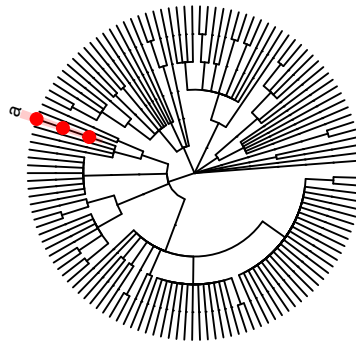

Model4

- a Streptococcaceae

Fig. S3. Significant differential taxa in the descending (DES) colon microbiome between microscopic colitis cases and controls that did not use antibiotics. Model 1 is adjusted for batch, education and PPI use. Model 2 is additionally adjusted for sex. Model 3 is adjusted for age along with the covariates in model 2. Model 4 is adjusted for BMI along with the covariates in model 3. The branches of significant taxa from phylum to family level were highlighted and labeled. The node sizes are proportional to the overall relative abundance of the taxa.

Table S1. The significant associations between individual taxa and case/control adjusted for covariates (see the 4 models in methods) in each of the stratified levels of liquid stools (0-2, 3, 4-5, >6) in the ascending (ASC) and descending (DES) colon microbiome. Insignificant results are not shown.

a.

|                                           | ASC, Liquid stools: 0-2 |          |       |             |         |          |       |             |
|-------------------------------------------|-------------------------|----------|-------|-------------|---------|----------|-------|-------------|
|                                           | model 1                 |          |       |             | model 2 |          |       |             |
|                                           | Stats                   | P        | FDR   | Enriched in | Stats   | P        | FDR   | Enriched in |
| g_Eggerthella--<br>s_uncultured bacterium | -3.88                   | 3.54E-04 | 0.087 | Case        | -4.04   | 2.23E-04 | 0.073 | Case        |
| f_Marinifilaceae                          | Insignificant           |          |       |             | -3.36   | 1.68E-03 | 0.092 | Case        |
| f_Muribaculaceae                          | Insignificant           |          |       |             | -3.35   | 1.69E-03 | 0.092 | Case        |
| f_Christensenellaceae                     | -3.51                   | 1.07E-03 | 0.087 | Case        | -3.48   | 1.19E-03 | 0.092 | Case        |
| g_Christensenellaceae_R-7_group           | -3.58                   | 8.57E-04 | 0.087 | Case        | -3.55   | 9.52E-04 | 0.092 | Case        |
| g_Akkermansia--unclassified               | -3.54                   | 9.65E-04 | 0.087 | Case        | -3.68   | 6.53E-04 | 0.092 | Case        |

b.

|                                             | ASC, Liquid stools: 3 |          |       |             |               |          |       |             |
|---------------------------------------------|-----------------------|----------|-------|-------------|---------------|----------|-------|-------------|
|                                             | model 1               |          |       |             | model 2       |          |       |             |
|                                             | Stats                 | P        | FDR   | Enriched in | Stats         | P        | FDR   | Enriched in |
| g_Ruminococcaceae_UCG-002                   | Insignificant         |          |       |             | Insignificant |          |       |             |
| g_Ruminococcaceae_UCG-002--<br>unclassified | Insignificant         |          |       |             | Insignificant |          |       |             |
| g_Ruminococcaceae_UCG-003                   | -4.41                 | 2.22E-04 | 0.036 | Case        | -4.03         | 6.01E-04 | 0.096 | Case        |
| g_Ruminococcaceae_UCG-003--<br>unclassified | -4.41                 | 2.22E-04 | 0.036 | Case        | -4.03         | 6.01E-04 | 0.096 | Case        |
| o_Betaproteobacteriales                     | Insignificant         |          |       |             | Insignificant |          |       |             |
| f_Burkholderiaceae                          | Insignificant         |          |       |             | Insignificant |          |       |             |
|                                             | model 4               |          |       |             |               |          |       |             |
|                                             | Stats                 | P        | FDR   | Enriched in |               |          |       |             |
| g_Ruminococcaceae_UCG-002                   | -3.97                 | 9.92E-04 | 0.065 | Case        |               |          |       |             |
| g_Ruminococcaceae_UCG-002--<br>unclassified | -3.97                 | 9.92E-04 | 0.065 | Case        |               |          |       |             |
| g_Ruminococcaceae_UCG-003                   | -4.55                 | 2.83E-04 | 0.045 | Case        |               |          |       |             |
| g_Ruminococcaceae_UCG-003--<br>unclassified | -4.55                 | 2.83E-04 | 0.045 | Case        |               |          |       |             |
| o_Betaproteobacteriales                     | -3.96                 | 1.02E-03 | 0.065 | Case        |               |          |       |             |

|                     |       |          |       |      |  |  |  |  |
|---------------------|-------|----------|-------|------|--|--|--|--|
| f__Burkholderiaceae | -3.85 | 1.28E-03 | 0.068 | Case |  |  |  |  |
|---------------------|-------|----------|-------|------|--|--|--|--|

c.

| DES, Liquid stools: 0-2      |               |          |       |             |       |          |       |             |  |
|------------------------------|---------------|----------|-------|-------------|-------|----------|-------|-------------|--|
|                              | model 1       |          |       |             |       | model 2  |       |             |  |
|                              | Stats         | P        | FDR   | Enriched in | Stats | P        | FDR   | Enriched in |  |
| f__Marinifilaceae            | Insignificant |          |       |             | -     | 2.09E-03 | 0.080 | Case        |  |
|                              | 3.28          |          |       |             |       |          |       |             |  |
| g__Odoribacter--unclassified | Insignificant |          |       |             | -     | 1.66E-03 | 0.072 | Case        |  |
|                              | 3.36          |          |       |             |       |          |       |             |  |
| f__Muribaculaceae            | Insignificant |          |       |             | -     | 2.88E-03 | 0.098 | Case        |  |
|                              | 3.17          |          |       |             |       |          |       |             |  |
| c__Deltaproteobacteria       | Insignificant |          |       |             | -     | 9.69E-04 | 0.049 | Case        |  |
|                              | 3.55          |          |       |             |       |          |       |             |  |
| o__Desulfovibrionales        | Insignificant |          |       |             | -     | 8.27E-04 | 0.049 | Case        |  |
|                              | 3.60          |          |       |             |       |          |       |             |  |
| f__Desulfovibrionaceae       | Insignificant |          |       |             | -     | 8.27E-04 | 0.049 | Case        |  |
|                              | 3.60          |          |       |             |       |          |       |             |  |
| g__Bilophila                 | -             | 4.83E-04 | 0.060 | Case        | -     | 2.37E-04 | 0.036 | Case        |  |
|                              | 3.78          |          |       |             | 4.02  |          |       |             |  |
| g__Bilophila--unclassified   | -             | 5.28E-04 | 0.060 | Case        | -     | 3.55E-04 | 0.036 | Case        |  |
|                              | 3.75          |          |       |             | 3.89  |          |       |             |  |
| g__Akkermansia--unclassified | -             | 5.92E-04 | 0.060 | Case        | -     | 3.53E-04 | 0.036 | Case        |  |
|                              | 3.71          |          |       |             | 3.89  |          |       |             |  |
| model 4                      |               |          |       |             |       |          |       |             |  |
|                              | Stats         | P        | FDR   | Enriched in |       |          |       |             |  |
| f__Marinifilaceae            | Insignificant |          |       |             |       |          |       |             |  |
| g__Odoribacter--unclassified | Insignificant |          |       |             |       |          |       |             |  |
| f__Muribaculaceae            | Insignificant |          |       |             |       |          |       |             |  |
| c__Deltaproteobacteria       | -             | 1.84E-03 | 0.096 | Case        |       |          |       |             |  |
|                              | 3.36          |          |       |             |       |          |       |             |  |
| o__Desulfovibrionales        | -             | 1.41E-03 | 0.096 | Case        |       |          |       |             |  |
|                              | 3.46          |          |       |             |       |          |       |             |  |
| f__Desulfovibrionaceae       | -             | 1.41E-03 | 0.096 | Case        |       |          |       |             |  |
|                              | 3.46          |          |       |             |       |          |       |             |  |
| g__Bilophila                 | -             | 4.55E-04 | 0.096 | Case        |       |          |       |             |  |
|                              | 3.86          |          |       |             |       |          |       |             |  |
| g__Bilophila--unclassified   | -             | 1.85E-03 | 0.096 | Case        |       |          |       |             |  |
|                              | 3.36          |          |       |             |       |          |       |             |  |
| g__Akkermansia--unclassified | -             | 1.89E-03 | 0.096 | Case        |       |          |       |             |  |
|                              | 3.35          |          |       |             |       |          |       |             |  |

d.

| DES, Liquid stools: 3                    |         |          |       |             |               |          |       |             |  |
|------------------------------------------|---------|----------|-------|-------------|---------------|----------|-------|-------------|--|
|                                          | model 1 |          |       |             |               | model 2  |       |             |  |
|                                          | Stats   | P        | FDR   | Enriched in | Stats         | P        | FDR   | Enriched in |  |
| g__Roseburia                             | -       | 1.88E-03 | 0.085 | Case        | Insignificant |          |       |             |  |
|                                          | 3.53    |          |       |             |               |          |       |             |  |
| g__Roseburia--unclassified               | -       | 1.88E-03 | 0.085 | Case        | Insignificant |          |       |             |  |
|                                          | 3.53    |          |       |             |               |          |       |             |  |
| g__Ruminococcaceae_UCG-003               | -       | 1.62E-03 | 0.085 | Case        | Insignificant |          |       |             |  |
|                                          | 3.59    |          |       |             |               |          |       |             |  |
| g__Ruminococcaceae_UCG-003--unclassified | -       | 1.62E-03 | 0.085 | Case        | Insignificant |          |       |             |  |
|                                          | 3.59    |          |       |             |               |          |       |             |  |
| o__Betaproteobacteriales                 | -       | 1.66E-05 | 0.005 | Case        | -             | 5.23E-05 | 0.016 | Case        |  |
|                                          | 5.48    |          |       |             | 5.06          |          |       |             |  |
| f__Burkholderiaceae                      | -       | 3.63E-05 | 0.005 | Case        | -             | 1.05E-04 | 0.016 | Case        |  |
|                                          | 5.15    |          |       |             | 4.76          |          |       |             |  |

|                                          |               |          |       |             |               |          |       |             |
|------------------------------------------|---------------|----------|-------|-------------|---------------|----------|-------|-------------|
| g__Sutterella                            | -<br>3.45     | 2.29E-03 | 0.085 | Case        | Insignificant |          |       |             |
| g__Sutterella--unclassified              | -<br>3.50     | 2.00E-03 | 0.085 | Case        | Insignificant |          |       |             |
| DES, Liquid stools: 3                    |               |          |       |             |               |          |       |             |
| model 3                                  |               |          |       |             | model 4       |          |       |             |
|                                          | Stats         | P        | FDR   | Enriched in | Stats         | P        | FDR   | Enriched in |
| g__Roseburia                             | Insignificant |          |       |             | Insignificant |          |       |             |
| g__Roseburia--unclassified               | Insignificant |          |       |             | Insignificant |          |       |             |
| g__Ruminococcaceae_UCG-003               | Insignificant |          |       |             | Insignificant |          |       |             |
| g__Ruminococcaceae_UCG-003--unclassified | Insignificant |          |       |             | Insignificant |          |       |             |
| o__Betaproteobacteriales                 | -<br>5.13     | 5.92E-05 | 0.015 | Case        | -<br>6.23     | 9.21E-06 | 0.003 | Case        |
| f__Burkholderiaceae                      | -<br>4.90     | 9.89E-05 | 0.015 | Case        | -<br>5.83     | 2.01E-05 | 0.003 | Case        |
| g__Sutterella                            | Insignificant |          |       |             | Insignificant |          |       |             |
| g__Sutterella--unclassified              | Insignificant |          |       |             | Insignificant |          |       |             |
